# Supplementary material for: Triterpenoid and Steroidal Saponins Differentially Influence Soil Bacterial Genera
Source: MDPI journal article supplement (doi:10.3390/plants10102189), 2021-10-15
Supplement: s1 [file s1]

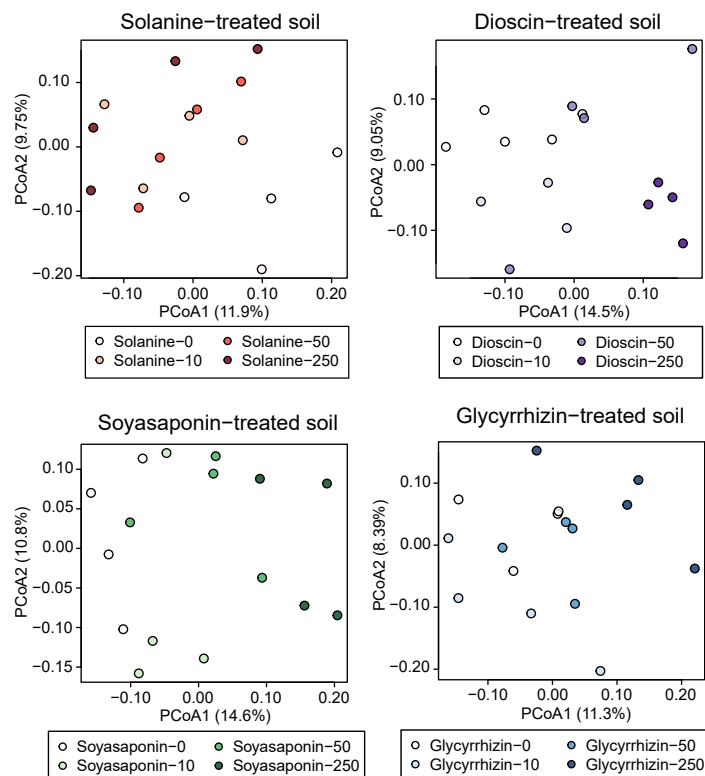

Figure S2. Unweighted UniFrac-based principal coordinate analysis (PCoA) of the bacterial communities in the soils treated with saponins, 10, 50, and 250 nmol (low, middle, and high concentrations) g soil<sup>-1</sup>.
