# Supplementary material for: Triterpenoid and Steroidal Saponins Differentially Influence Soil Bacterial Genera
Source: MDPI journal article supplement (doi:10.3390/plants10102189), 2021-10-15
Supplement: s1 [file s1]

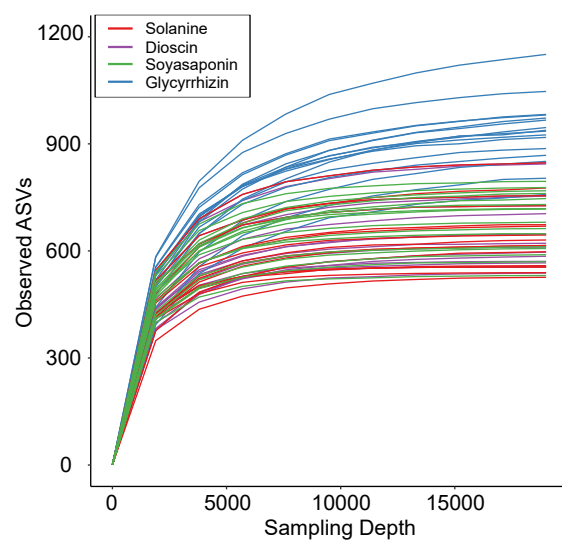

Figure S1. Rarefaction curves for observed ASVs richness of saponin-treated soils. ASVs, amplicon sequence variants.
